# Supplementary material
Source: publisher figshare collection journal article supplement (https://gsapubs.figshare.com/ndownloader/files/25378598)
Supplement: Supplementary file 1 [file 25378598]

## Sheet: Sheet1
Table S3. Whole-rock major (wt. %) and trace (ppm) element compositions of the Paleozoic igneous rocks in the Baluntai domain of the Chinese Central Tianshan Block.
Rock type	JT59-1 Gneissic granite			W2-3 Augen granitic gneiss			W4-3 Gneissic granodiorite			JT47-1 Gneissic granite			12W26-1 Rhyolitic tuff			12W30-2 Granodiorite
Sample	JT59-1	12W41-1	12W41-2	W2-2	W2-7	W2-9	W4-2	W4-6	W4-8	JT47-1	JT47-3	JT47-4	083-5	12W26-2	12W26-3	087-4	12W30-1	12W30-3
SiO2	76.74	69.77	71.06	70.91	65.56	66.96	65.65	63.02	62.54	74.17	73.95	73.83	67.43	67.18	63.95	65.75	51.39	58.87
TiO2	0.12	0.56	0.46	0.39	0.73	0.73	0.47	0.52	0.54	0.26	0.25	0.26	0.28	0.27	0.26	0.53	0.71	0.67
Al2O3	12.26	14.18	14.23	14.07	14.6	14.1	15.7	16.5	16.7	13.52	13.52	13.68	11.62	11.44	11.13	15.29	17.99	17.39
Fe2O3T	1.01	4.02	3.32	2.33	4.36	4.62	5.04	6.22	6.16	1.59	1.45	1.47	2.98	2.61	2.47	3.43	5.92	4.76
MnO	0.01	0.05	0.04	0.03	0.07	0.05	0.08	0.1	0.1	0.02	0.02	0.01	0.04	0.04	0.05	0.06	0.17	0.11
MgO	0.34	1.47	1.22	0.73	1.2	1.36	1.14	1.53	1.56	0.54	0.53	0.6	0.69	0.63	0.57	2.04	2.75	2.23
CaO	0.83	1.71	1.81	1.02	2.33	1.62	4.65	5.28	5.27	0.47	0.56	0.54	4.98	5.68	7.75	2.68	5.87	3.46
Na2O	2.57	3.06	3.04	3.09	3.63	3.54	3.17	3.31	3.39	3.71	3.55	3.57	2.13	2.22	2.42	3.66	5.41	5.63
K2O	5.47	3.52	3.89	6.05	5.16	4.49	2.23	1.8	1.79	5.4	5.5	5.47	5.02	4.92	4.54	4.56	3.1	3.05
P2O5	0.08	0.1	0.1	0.1	0.2	0.2	0.1	0.13	0.14	0.06	0.06	0.06	0.06	0.05	0.05	0.13	0.18	0.18
LOI	0.479808	1.43914	1.1988	1.07957	2.53696	1.64	1.13863	1.41858	1.29948	0.659604	0.579421	0.519688	4.87707	5.31787	7.01159	1.63771	5.78	3.51789
TOTAL	99.9098	99.8791	100.369	99.7996	100.377	99.31	99.3686	99.8286	99.4895	100.4	99.9694	100.01	100.107	100.358	100.202	99.7677	99.27	99.8679
A/CNK	1.05158	1.18625	1.13812	1.04319	0.924402	1.0345	0.97617	0.970962	0.976834	1.05594	1.05523	1.07072	0.645812	0.592582	0.484198	0.96588	0.784626	0.922338
A/NK	1.20793	1.60323	1.54468	1.20949	1.26322	1.31968	2.05793	2.2316	2.22235	1.13146	1.14632	1.15984	1.29997	1.27416	1.25112	1.39538	1.46788	1.38416
Na2O+K2O	8.04	6.58	6.93	9.14	8.79	8.03	5.4	5.11	5.18	9.11	9.05	9.04	7.15	7.14	6.96	8.22	8.51	8.68
K2O/Na2O	2.1284	1.15033	1.27961	1.95793	1.42149	1.26836	0.70347	0.543807	0.528024	1.45553	1.5493	1.53221	2.35681	2.21622	1.87603	1.2459	0.573013	0.541741
Be	2.144			1.301			1.893					2.265	1.498	1.84295	1.90091	1.556
Sc	2.278			5.111			5.681					2.624	5.453	4.01997	6.17168	9.91
V	15.071			29.403			46.12					17.803	22.401	36.8903	40.4672	62.375
Cr	8.424			14.243			8.767					68.142	18.525	28.4449	17.7752	35.248
Co	2.503			4.342			9.084					3.198	4.804	4.93039	3.78153	11.87
Ni	7.721			25.893			5.325					33.562	12.005	9.37578	5.05533	27.814
Ga	11.834			15.723			18.097					16.221	15.919	11.6919	12.503	15.579
Rb	124.713			141.286			65.509					164.049	159.981	113.591	151.785	98.349
Sr	107.975			185.934			357.235					192.957	63.07	41.08	84.8453	292.751
Cs	3.076			2.047			2.145					1.443	7.261	6.06399	6.21524	1.435
Ba	556.26			1175.83			1005.05					836.274	292.337	196.087	268.175	935.105
Y	13.035			17.297			12.781					8.676	21.729	23.5286	24.9526	17.928
Nb	3.652			5.411			9.833					16.5	10.624	10.0685	10.2439	8.993
Ta	0.399			0.265			0.728					1.594	0.753	0.644395	0.712997	0.655
Zr	44.414			174.787			124.899					178.631	237.242	217.954	246.789	140.205
Hf	1.561			4.818			3.546					5.433	6.86	5.43763	6.37481	4.162
Pb	33.531			16.005			7.728					34.958	11.979	12.0454	12.2778	14.363
Th	4.547			10.045			8.656					47.026	15.507	12.3042	15.923	15.675
U	0.794			1.682			1.565					4.242	1.742	1.32885	2.00699	4.089
La	11.461			38.088			20.523					33.875	89.808	57.4748	82.7186	24.06
Ce	18.415			64.397			38.889					59.229	164.364	113.324	150.486	55.31
Pr	2.12			7.336			4.585					6.443	17.229	12.3657	16.7862	6.162
Nd	7.462			26.249			16.903					20.746	59.359	41.7863	54.3762	24.25
Sm	1.6			4.403			3.186					2.972	7.847	6.88907	8.39319	4.556
Eu	0.691			1.334			1.041					0.665	0.685	0.523279	0.644785	1.138
Gd	1.63			3.941			2.717					2.257	6.168	5.78281	6.63408	3.776
Tb	0.313			0.615			0.413					0.309	0.818	0.734343	0.82016	0.582
Dy	2.107			3.379			2.286					1.672	4.219	3.93217	4.27053	3.249
Ho	0.482			0.684			0.478					0.345	0.851	0.824438	0.915067	0.678
Er	1.379			1.771			1.324					0.975	2.271	2.25082	2.46337	1.819
Tm	0.227			0.256			0.211					0.15	0.335	0.327314	0.378199	0.288
Yb	1.473			1.582			1.393					1.08	2.148	2.05022	2.45845	1.917
∑REE	49.576			154.276			94.173					130.9	356.437	248.587	331.732	128.075
Eu/Eu*	1.30812			0.979043			1.0817					0.784974	0.301016	0.253459	0.264171	0.838799
Mg# = 100*Mg2+/(Mg2+ + Fe2+), Fe2+ calculated from 0.8998*Fe2O3T; Total Fe as Fe2O3T; LOI: loss on ignition.
